# Supplementary material for: Olfactory sensory neuron population expansions influence projection neuron adaptation and enhance odour tracking
Source: PubMed Central journal article supplement — Nat Commun. 2024 Aug 15;15:7041. doi: 10.1038/s41467-024-50808-w (PMC11327376; doi:10.1038/s41467-024-50808-w), 2024-08-15
Supplement: 41467_2024_50808_MOESM3_ESM.pdf [file 41467_2024_50808_MOESM3_ESM.pdf]

## **Description of Additional Supplementary Files**

**Supplementary Data 1.** Spike counts for electrophysiological experiments.

**Supplementary Data 2.** P values from statistical analyses.
